# Supplementary material
Source: PubMed Central journal article supplement (PMC7508869)
Supplement: NIHMS1606292-supplement-1.pdf [file NIHMS1606292-supplement-1.pdf]

**Table S1.** Characteristics of MEPS responders 18 years of age or older using any ophthalmic medications from 2007-2016 by cycle.

| Cycle                                           | 2007-2008  | 2009-2010  | 2011-2012  | 2013-2014  | 2015-2016  |
|-------------------------------------------------|------------|------------|------------|------------|------------|
| Total number of MEPS participants               | 1,770      | 1,938      | 1,848      | 2,133      | 2,296      |
| Annual weighted number of individuals, millions | 10.0       | 10.6       | 10.1       | 11.5       | 12.2       |
| <b>Parameter, %</b>                             |            |            |            |            |            |
| <b>Gender</b>                                   |            |            |            |            |            |
| Female                                          | 60.1       | 60.0       | 59.3       | 59.4       | 59.5       |
| Male                                            | 39.9       | 40.0       | 40.7       | 40.6       | 40.5       |
| Age (SE), y                                     | 60.6 (0.6) | 61.5 (0.7) | 60.8 (0.7) | 62.3 (0.6) | 62.2 (0.5) |
| <b>Age category</b>                             |            |            |            |            |            |
| 18-39                                           | 17.3       | 13.8       | 15.7       | 13.7       | 12.9       |
| 40-64                                           | 34.7       | 37.5       | 35.5       | 31.9       | 33.7       |
| 65 and over                                     | 48.0       | 48.7       | 48.8       | 54.5       | 53.4       |
| <b>Race/ethnicity</b>                           |            |            |            |            |            |
| Non-Hispanic White                              | 75.8       | 76.4       | 74.5       | 70.4       | 71.0       |
| Non-Hispanic Black                              | 10.2       | 11.0       | 10.0       | 11.8       | 11.1       |
| Non-Hispanic Asian                              | 3.9        | 3.2        | 4.4        | 5.6        | 4.3        |
| Hispanic                                        | 8.4        | 8.2        | 9.6        | 10.4       | 11.4       |
| Other                                           | 1.7        | 1.3        | 1.6        | 1.8        | 2.2        |
| <b>Insurance status</b>                         |            |            |            |            |            |
| Uninsured                                       | 3.6        | 4.3        | 4.6        | 2.9        | 1.9        |
| Private                                         | 42.3       | 38.9       | 38.6       | 33.0       | 34.8       |
| Medicaid                                        | 3.0        | 3.5        | 4.4        | 4.0        | 4.0        |
| Any Medicare                                    | 50.0       | 52.1       | 51.6       | 58.6       | 57.4       |
| Other (public/private)                          | 1.1        | 1.3        | 0.7        | 1.5        | 1.9        |
| <b>Family income level</b>                      |            |            |            |            |            |
| <100% FPL                                       | 9.0        | 8.5        | 10.3       | 10.6       | 9.5        |
| 100-124% FPL                                    | 4.4        | 4.8        | 6.1        | 5.8        | 4.7        |
| 125%-199% FPL                                   | 11.8       | 13.4       | 14.3       | 14.6       | 12.0       |
| 200-399% FPL                                    | 28.7       | 30.7       | 28.6       | 27.6       | 25.4       |
| >400% FPL                                       | 46.2       | 42.8       | 40.8       | 41.4       | 48.5       |
| <b>Region</b>                                   |            |            |            |            |            |
| Northeast                                       | 18.8       | 21.3       | 19.7       | 22.7       | 19.4       |
| Midwest                                         | 24.5       | 23.6       | 21.5       | 21.6       | 22.6       |
| South                                           | 35.6       | 35.5       | 36.1       | 33.9       | 36.6       |
| West                                            | 21.2       | 19.7       | 22.7       | 21.9       | 21.4       |
| <b>Visually impaired</b>                        |            |            |            |            |            |
| No                                              | 84.0       | 82.8       | 84.4       | 87.8       | 88.7       |
| Yes                                             | 16.0       | 17.2       | 15.6       | 12.2       | 11.3       |

Abbreviations: MEPS, Medical Expenditure Panel Survey; SE, standard error; FPL, federal poverty line
