# Supplementary material
Source: PubMed Central journal article supplement (PMC7508869)
Supplement: NIHMS1606292-supplement-2.pdf [file NIHMS1606292-supplement-2.pdf]

**Table S2.** National ophthalmic medication expenditure of adult MEPS participants by ophthalmic sub-class from 2007-2016 (adjusted for inflation to 2016 GDP Price Index).

|                                   | <b>Total expenditure</b>                                |                  |                  |                  |                  |
|-----------------------------------|---------------------------------------------------------|------------------|------------------|------------------|------------------|
|                                   | <b>Millions \$ (% of total ophthalmic expenditures)</b> |                  |                  |                  |                  |
|                                   | <b>2007-2008</b>                                        | <b>2009-2010</b> | <b>2011-2012</b> | <b>2013-2014</b> | <b>2015-2016</b> |
| <b>All ophthalmic medications</b> | 3,391.5                                                 | 4,553.5          | 3,918.7          | 4,423.3          | 6,078.3          |
| Dry eyes                          | 310.8 (9.2)                                             | 635.1 (13.9)     | 699.2 (17.8)     | 774.8 (17.5)     | 1,794.6 (29.5)   |
| Glaucoma                          | 2,281.3 (67.3)                                          | 2,833.1 (62.2)   | 2,305.2 (58.8)   | 2,227.9 (50.4)   | 2,594.8 (42.7)   |
| Steroids                          | 221.8 (6.5)                                             | 245.3 (5.4)      | 268.5 (6.9)      | 493.3 (11.2)     | 691.9 (11.4)     |
| Lubricants                        | 25.3 (0.7)                                              | 27.2 (0.6)       | 22.7 (0.6)       | 33.0 (0.7)       | 34.0 (0.6)       |
| Antihistamines/decongestants      | 240.9 (7.1)                                             | 372.5 (8.2)      | 231.6 (5.9)      | 268.5 (6.1)      | 410.0 (6.7)      |
| NSAIDs                            | 140.8 (4.2)                                             | 181.8 (4.0)      | 159.4 (4.1)      | 305.7 (6.9)      | 274.1 (4.5)      |
| Anti-infectives                   | 164.3 (4.8)                                             | 249.1 (5.5)      | 213.5 (5.4)      | 289.3 (6.5)      | 239.0 (3.9)      |
| Other                             | 6.5 (0.2)                                               | 9.3 (0.2)        | 18.6 (0.3)       | 31.0 (0.7)       | 39.9 (0.7)       |

  

|                                   | <b>Out-of-pocket expenditure,</b>                       |                  |                  |                  |                  |
|-----------------------------------|---------------------------------------------------------|------------------|------------------|------------------|------------------|
|                                   | <b>Millions \$ (% of total ophthalmic expenditures)</b> |                  |                  |                  |                  |
|                                   | <b>2007-2008</b>                                        | <b>2009-2010</b> | <b>2011-2012</b> | <b>2013-2014</b> | <b>2015-2016</b> |
| <b>All ophthalmic medications</b> | 1,336.3                                                 | 1,334.8          | 1,074.4          | 1,044.4          | 1,176.6          |
| Dry eyes                          | 63.2 (4.7)                                              | 88.7 (6.6)       | 98.7 (9.2)       | 135.9 (13.0)     | 185.9 (15.8)     |
| Glaucoma                          | 934.3 (69.9)                                            | 862.7 (64.6)     | 636.0 (59.2)     | 526.3 (50.4)     | 552.5 (47.0)     |
| Steroids                          | 109.6 (8.2)                                             | 93.0 (7.0)       | 101.4 (9.4)      | 128.3 (12.3)     | 188.1 (16.0)     |
| Lubricants                        | 75.8 (0.6)                                              | 118.3 (0.9)      | 97.5 (0.9)       | 103.4 (1.0)      | 148.2 (1.3)      |
| Antihistamines/decongestants      | 69.2 (5.2)                                              | 111.9 (8.4)      | 73.1 (6.8)       | 57.6 (5.5)       | 67.3 (5.7)       |
| NSAIDs                            | 56.2 (4.2)                                              | 60.7 (4.6)       | 54.1 (5.0)       | 79.0 (7.6)       | 68.0 (5.8)       |
| Anti-infectives                   | 92.4 (6.9)                                              | 98.6 (7.4)       | 85.6 (8.0)       | 96.8 (9.3)       | 85.2 (7.2)       |
| Other                             | 3.8 (0.3)                                               | 7.3 (0.5)        | 15.7 (1.2)       | 10.1 (1.0)       | 14.8 (1.3)       |

Abbreviations: MEPS, Medical Expenditure Panel Survey; GDP, Gross Domestic Product; SE, standard error; NSAIDs, non-steroidal anti-inflammatory drugs
