# Supplementary material
Source: PubMed Central journal article supplement (PMC7508869)
Supplement: NIHMS1606292-supplement-3.pdf [file NIHMS1606292-supplement-3.pdf]

**Table S3.** National ophthalmic medication expenditure by of adult MEPS participants by population demographics from 2007-2016 (adjusted for inflation to 2016 GDP Price Index).

| <b>Total expenditure</b>                       | <b>2007-2008</b> | <b>2009-2010</b> | <b>2011-2012</b> | <b>2013-2014</b> | <b>2015-2016</b> |
|------------------------------------------------|------------------|------------------|------------------|------------------|------------------|
| <b>National Expenditure in millions \$ (%)</b> |                  |                  |                  |                  |                  |
| Gender                                         |                  |                  |                  |                  |                  |
| Female                                         | 2,080.7 (61.4)   | 2,831.8 (62.2)   | 2,321.7 (59.2)   | 2,644.7 (59.8)   | 3,739.4 (61.5)   |
| Male                                           | 1,310.8 (38.6)   | 1,721.7 (37.8)   | 1,597.0 (40.8)   | 1,778.7 (40.2)   | 2,339.0 (38.5)   |
| Age category                                   |                  |                  |                  |                  |                  |
| 18-39                                          | 243.8 (7.2)      | 196.0 (4.3)      | 219.6 (5.6)      | 205.4 (4.6)      | 202.0 (3.3)      |
| 40-64                                          | 979.1 (28.9)     | 1,520.1 (33.4)   | 1,042.7 (26.6)   | 1,199.1 (27.1)   | 1,903.6 (31.3)   |
| 65 and over                                    | 2,168.6 (63.9)   | 2,837.4 (62.3)   | 2,656.4 (67.8)   | 3,019.0 (68.3)   | 3,972.8 (65.4)   |
| Race/ethnicity                                 |                  |                  |                  |                  |                  |
| Non-Hispanic White                             | 2,544.0 (75.0)   | 3,488.0 (76.6)   | 2,879.9 (73.5)   | 3,109.1 (70.3)   | 4,224.3 (69.5)   |
| Non-Hispanic Black                             | 386.7 (11.4)     | 558.1 (12.3)     | 388.9 (9.9)      | 553.0 (12.5)     | 647.5 (10.7)     |
| Non-Hispanic Asian                             | 142.1 (4.2)      | 105.4 (2.3)      | 235.7 (6.0)      | 232.8 (5.3)      | 266.6 (4.4)      |
| Hispanic                                       | 226.6 (6.7)      | 336.3 (7.4)      | 363.2 (9.3)      | 479.1 (10.8)     | 680.5 (11.2)     |
| Other                                          | 92.1 (2.7)       | 65.7 (1.4)       | 50.9 (1.3)       | 49.5 (1.1)       | 259.5 (4.3)      |
| Insurance status                               |                  |                  |                  |                  |                  |
| Uninsured                                      | 46.2 (1.4)       | 55.7 (1.2)       | 37.5 (1.0)       | 59.5 (1.3)       | 66.2 (1.1)       |
| Private                                        | 968.7 (28.6)     | 1,272.5 (27.9)   | 1,009.6 (25.8)   | 1,001.8 (22.6)   | 1,543.3 (25.4)   |
| Medicaid                                       | 58.0 (1.7)       | 136.4 (3.0)      | 103.7 (2.6)      | 99.7 (2.3)       | 88.6 (1.5)       |
| Any Medicare                                   | 2,295.7 (67.7)   | 3,035.6 (66.7)   | 2,757.8 (70.4)   | 3,244.6 (73.4)   | 4,271.8 (70.3)   |
| Other (public/private)                         | 23.0 (0.7)       | 53.3 (1.2)       | 10.1 (0.3)       | 17.7 (0.4)       | 108.5 (1.8)      |
| Family income level                            |                  |                  |                  |                  |                  |
| <100% FPL                                      | 266.4 (7.9)      | 389.2 (8.5)      | 421.2 (10.7)     | 439.5 (9.9)      | 748.0 (12.3)     |
| 100-124% FPL                                   | 162.0 (4.8)      | 226.9 (5.0)      | 243.2 (6.2)      | 323.3 (7.3)      | 244.3 (4.0)      |
| 125%-199% FPL                                  | 486.3 (14.3)     | 636.2 (14.0)     | 607.1 (15.5)     | 626.2 (14.2)     | 753.3 (12.4)     |
| 200-399% FPL                                   | 1,053.7 (31.1)   | 1,471.2 (32.3)   | 924.9 (23.6)     | 1,019.4 (23.0)   | 1,256.7 (20.7)   |
| >400% FPL                                      | 1,423.1 (42.0)   | 1,830.1 (40.2)   | 1,722.3 (44.0)   | 2,014.9 (45.6)   | 3,076.0 (50.6)   |
| Region                                         |                  |                  |                  |                  |                  |
| Northeast                                      | 869.0 (25.6)     | 1,132.8 (24.9)   | 1,136.1 (29.0)   | 1,286.2 (29.1)   | 1,613.5 (26.5)   |
| Midwest                                        | 804.3 (23.7)     | 1,123.2 (24.7)   | 704.4 (18.0)     | 842.8 (19.1)     | 1,252.0 (20.6)   |
| South                                          | 1,167.0 (34.4)   | 1,513.1 (33.2)   | 1,188.5 (30.3)   | 1,292.5 (29.2)   | 2,168.3 (35.7)   |
| West                                           | 551.3 (16.3)     | 784.4 (17.2)     | 889.7 (22.7)     | 1,001.9 (22.6)   | 1,044.6 (17.2)   |
| Visually impaired                              |                  |                  |                  |                  |                  |
| No                                             | 2,558.3 (75.4)   | 3,520.8 (77.3)   | 3,099.7 (79.1)   | 3,418.7 (77.3)   | 4,950.6 (81.4)   |
| Yes                                            | 833.2 (24.6)     | 1,032.8 (22.7)   | 819.0 (20.9)     | 1,004.7 (22.7)   | 1,127.7 (18.6)   |

Abbreviations: MEPS, Medical Expenditure Panel Survey; GDP, Gross Domestic Product; FPL, federal poverty line
