# Supplementary material
Source: PubMed Central journal article supplement (PMC7508869)
Supplement: NIHMS1606292-supplement-4.pdf [file NIHMS1606292-supplement-4.pdf]

**Table S4.** Per capita total ophthalmic expenditure of adult MEPS participants using any ophthalmic medication by population characteristics from 2007-2016 (adjusted for inflation to 2016 GDP Price Index).

|                                          | 2007-2008       | 2009-2010       | 2011-2012       | 2013-2014       | 2015-2016       | Slope  | P-value <sup>†</sup> |
|------------------------------------------|-----------------|-----------------|-----------------|-----------------|-----------------|--------|----------------------|
| <b>Per capita expenditure in \$ (SE)</b> |                 |                 |                 |                 |                 |        |                      |
| Gender                                   |                 |                 |                 |                 |                 |        |                      |
| Female                                   | 345.96 (20.62)  | 446.88 (30.87)  | 387.99 (37.16)  | 386.21 (23.85)  | 515.92 (39.40)  | 28.50  | <b>0.007</b>         |
| Male                                     | 328.88 (25.22)  | 408.32 (35.75)  | 389.26 (33.52)  | 380.22 (60.78)  | 475.14 (59.00)  | 26.67  | 0.14                 |
| Age category                             |                 |                 |                 |                 |                 |        |                      |
| 18-39                                    | 140.57 (25.24)  | 134.16 (20.60)  | 138.41 (41.61)  | 130.30 (27.33)  | 128.70 (22.90)  | -2.79  | 0.73                 |
| 40-64                                    | 282.58 (20.92)  | 384.47 (37.75)  | 291.18 (30.87)  | 326.67 (28.64)  | 463.60 (48.96)  | 31.02  | <b>0.02</b>          |
| 65 and over                              | 451.70 (26.38)  | 552.16 (33.22)  | 540.03 (47.66)  | 480.79 (50.42)  | 611.66 (49.04)  | 24.85  | 0.10                 |
| Race/ethnicity                           |                 |                 |                 |                 |                 |        |                      |
| Non-Hispanic White                       | 335.40 (19.12)  | 432.40 (28.44)  | 383.23 (25.22)  | 383.18 (38.29)  | 488.90 (41.10)  | 26.03  | <b>0.03</b>          |
| Non-Hispanic Black                       | 378.64 (32.77)  | 481.60 (50.92)  | 384.46 (43.02)  | 406.43 (34.89)  | 481.50 (62.35)  | 13.06  | 0.41                 |
| Non-Hispanic Asian                       | 365.16 (92.15)  | 315.33 (68.24)  | 536.28 (146.30) | 363.36 (61.70)  | 509.28 (146.01) | 30.16  | 0.42                 |
| Hispanic                                 | 270.05 (39.54)  | 390.39 (41.19)  | 376.75 (110.33) | 398.34 (69.89)  | 488.52 (85.85)  | 45.03  | 0.07                 |
| Other                                    | 556.38 (163.45) | 496.59 (222.62) | 325.60 (170.18) | 237.74 (69.36)  | 964.03 (323.39) | 80.88  | 0.34                 |
| Insurance status                         |                 |                 |                 |                 |                 |        |                      |
| Uninsured                                | 128.98 (22.64)  | 124.21 (23.12)  | 81.11 (14.55)   | 176.96 (49.91)  | 281.52 (112.73) | 30.89  | 0.15                 |
| Private                                  | 229.05 (20.19)  | 309.93 (35.30)  | 259.23 (32.44)  | 263.10 (25.90)  | 364.40 (46.42)  | 22.99  | <b>0.04</b>          |
| Medicaid                                 | 191.36 (54.09)  | 368.91 (68.52)  | 231.54 (69.85)  | 218.47 (33.62)  | 183.00 (38.31)  | -21.00 | 0.15                 |
| Medicare                                 | 458.95 (26.13)  | 552.63 (32.39)  | 529.42 (45.12)  | 480.07 (45.55)  | 611.04 (47.23)  | 23.32  | 0.10                 |
| Other (public/private)                   | 213.56 (61.91)  | 390.27 (112.60) | 138.91 (68.48)  | 106.40 (36.32)  | 481.09 (266.41) | 36.27  | 0.58                 |
| Family income level                      |                 |                 |                 |                 |                 |        |                      |
| <100% FPL                                | 296.87 (32.81)  | 436.05 (60.49)  | 405.21 (63.55)  | 358.44 (47.01)  | 645.78 (98.37)  | 62.94  | <b>0.01</b>          |
| 100-124% FPL                             | 368.52 (49.06)  | 452.93 (80.99)  | 398.41 (77.96)  | 483.37 (93.26)  | 429.53 (76.53)  | 15.11  | 0.50                 |
| 125%-199% FPL                            | 412.08 (55.93)  | 450.21 (53.69)  | 422.02 (69.13)  | 372.48 (37.93)  | 517.34 (88.17)  | 12.43  | 0.60                 |
| 200-399% FPL                             | 367.75 (33.35)  | 454.87 (41.35)  | 321.16 (33.95)  | 320.53 (32.74)  | 406.59 (38.80)  | -6.45  | 0.58                 |
| >400% FPL                                | 308.18 (21.10)  | 405.54 (37.24)  | 418.21 (46.20)  | 422.49 (62.52)  | 521.65 (57.08)  | 45.21  | <b>0.007</b>         |
| Region                                   |                 |                 |                 |                 |                 |        |                      |
| Northeast                                | 463.13 (51.17)  | 504.39 (64.12)  | 572.12 (99.47)  | 492.20 (103.49) | 683.19 (117.57) | 42.19  | 0.22                 |
| Midwest                                  | 328.08 (29.09)  | 451.27 (48.03)  | 324.88 (38.21)  | 338.95 (35.81)  | 456.08 (47.95)  | 15.19  | 0.27                 |
| South                                    | 328.24 (22.48)  | 404.39 (31.63)  | 326.55 (35.54)  | 330.97 (32.95)  | 486.78 (43.07)  | 26.26  | <b>0.03</b>          |
| West                                     | 260.40 (28.85)  | 377.68 (49.77)  | 387.99 (45.48)  | 397.43 (39.87)  | 400.29 (51.17)  | 29.09  | <b>0.03</b>          |
| Visually impaired                        |                 |                 |                 |                 |                 |        |                      |
| No                                       | 304.38 (15.63)  | 403.12 (23.54)  | 364.14 (25.65)  | 337.63 (18.90)  | 458.73 (28.42)  | 24.88  | <b>0.001</b>         |
| Yes                                      | 522.36 (47.53)  | 567.51 (69.01)  | 520.32 (94.82)  | 717.46 (199.05) | 818.00 (177.26) | 72.53  | 0.17                 |

<sup>†</sup> Significance denotes association between per capita total expenditure and year effect by linear regression, significant p-values are bolded  
Abbreviations: MEPS, Medical Expenditure Panel Survey; GDP, Gross Domestic Product; SE, standard error; FPL, federal poverty line
