# Supplementary material
Source: PubMed Central journal article supplement (PMC7508869)
Supplement: NIHMS1606292-supplement-5.pdf [file NIHMS1606292-supplement-5.pdf]

**Table S5.** Per capita OOP expenditure for ophthalmics of MEPS participants 18 years of age or older using any ophthalmic medication by population characteristics from 2007-2016 (adjusted for inflation to 2016 GDP Price Index).

|                                              | 2007-2008      | 2009-2010       | 2011-2012      | 2013-2014      | 2015-2016      | Slope  | P-value <sup>†</sup> |
|----------------------------------------------|----------------|-----------------|----------------|----------------|----------------|--------|----------------------|
| <b>Per capita OOP expenditure in \$ (SE)</b> |                |                 |                |                |                |        |                      |
| Gender                                       |                |                 |                |                |                |        |                      |
| Female                                       | 133.34 (10.40) | 129.74 (10.34)  | 108.29 (13.53) | 86.88 (7.51)   | 88.67 (9.87)   | -13.16 | <b>&lt;0.001</b>     |
| Male                                         | 134.06 (13.78) | 121.58 (14.23)  | 103.90 (8.64)  | 96.05 (15.77)  | 108.46 (12.42) | -7.36  | 0.13                 |
| Age category                                 |                |                 |                |                |                |        |                      |
| 18-39                                        | 52.17 (8.64)   | 39.84 (5.27)    | 37.64 (5.25)   | 34.83 (4.69)   | 35.84 (7.95)   | -3.89  | 0.13                 |
| 40-64                                        | 107.28 (8.90)  | 110.41 (15.01)  | 80.85 (7.65)   | 83.17 (10.85)  | 87.27 (15.08)  | -6.65  | 0.12                 |
| 65 and over                                  | 182.06 (14.87) | 163.48 (11.68)  | 147.39 (17.57) | 108.94 (12.87) | 117.32 (10.38) | -18.20 | <b>&lt;0.001</b>     |
| Race/ethnicity                               |                |                 |                |                |                |        |                      |
| Non-Hispanic White                           | 136.95 (10.44) | 134.57 (9.95)   | 114.92 (10.73) | 101.59 (10.18) | 103.90 (10.09) | -9.85  | <b>0.006</b>         |
| Non-Hispanic Black                           | 135.02 (18.27) | 112.14 (10.92)  | 103.01 (12.49) | 70.72 (8.97)   | 89.98 (13.18)  | 12.84  | <b>0.005</b>         |
| Non-Hispanic Asian                           | 129.14 (35.68) | 61.48 (12.87)   | 104.17 (19.81) | 74.17 (14.33)  | 59.21 (15.86)  | -13.33 | 0.10                 |
| Hispanic                                     | 96.27 (18.07)  | 79.69 (13.77)   | 54.62 (7.73)   | 53.21 (7.56)   | 73.07 (15.96)  | -6.04  | 0.27                 |
| Other                                        | 172.72 (59.87) | 227.67 (100.78) | 50.92 (15.41)  | 58.63 (17.43)  | 93.31 (31.48)  | -28.34 | 0.09                 |
| Insurance status                             |                |                 |                |                |                |        |                      |
| Uninsured                                    | 89.26 (16.96)  | 72.48 (15.72)   | 64.39 (13.6)   | 136.11 (40.62) | 101.58 (23.68) | 9.39   | 0.25                 |
| Private                                      | 90.73 (8.39)   | 91.76 (13.87)   | 74.30 (6.87)   | 74.59 (9.62)   | 85.43 (14.89)  | -2.70  | 0.50                 |
| Medicaid                                     | 22.47 (5.37)   | 88.08 (48.83)   | 21.58 (6.58)   | 12.61 (3.12)   | 14.14 (4.28)   | -10.36 | 0.09                 |
| Medicare                                     | 178.95 (14.33) | 159.84 (11.09)  | 142.71 (16.70) | 104.44 (11.47) | 110.88 (9.57)  | -18.95 | <b>&lt;0.001</b>     |
| Other (public/private)                       | 173.48 (65.94) | 109.98 (33.72)  | 28.32 (11.85)  | 16.84 (9.93)   | 39.36 (13.58)  | -32.27 | <b>0.009</b>         |
| Family income level                          |                |                 |                |                |                |        |                      |
| <100% FPL                                    | 67.12 (10.99)  | 88.75 (13.35)   | 80.34 (15.87)  | 59.34 (12.03)  | 45.59 (7.58)   | -7.69  | <b>0.01</b>          |
| 100-124% FPL                                 | 130.71 (28.20) | 121.33 (26.28)  | 111.53 (29.44) | 45.00 (7.91)   | 48.28 (9.88)   | -24.90 | <b>&lt;0.001</b>     |
| 125%-199% FPL                                | 163.11 (27.98) | 135.14 (18.31)  | 160.06 (48.55) | 86.28 (16.30)  | 93.53 (15.52)  | -19.26 | 0.09                 |
| 200-399% FPL                                 | 147.41 (14.34) | 138.53 (14.87)  | 85.60 (8.77)   | 78.89 (8.22)   | 77.41 (7.09)   | -20.02 | <b>&lt;0.001</b>     |
| >400% FPL                                    | 130.74 (12.80) | 123.17 (14.23)  | 108.27 (8.03)  | 114.37 (16.29) | 122.25 (15.56) | -2.24  | 0.67                 |
| Region                                       |                |                 |                |                |                |        |                      |
| Northeast                                    | 185.83 (27.43) | 158.45 (27.85)  | 160.62 (38.00) | 115.19 (28.67) | 132.80 (30.74) | -14.91 | 0.13                 |
| Midwest                                      | 128.34 (15.81) | 122.79 (12.54)  | 95.72 (12.88)  | 90.91 (13.33)  | 99.04 (14.73)  | 8.86   | 0.11                 |
| South                                        | 122.26 (9.54)  | 115.25 (11.40)  | 88.70 (7.73)   | 75.12 (8.15)   | 92.31 (7.67)   | -9.55  | <b>0.002</b>         |
| West                                         | 112.57 (16.24) | 116.57 (14.79)  | 98.10 (9.89)   | 88.78 (9.10)   | 68.94 (7.15)   | -11.64 | <b>0.003</b>         |
| Visually impaired                            |                |                 |                |                |                |        |                      |
| No                                           | 119.11 (8.26)  | 120.40 (8.92)   | 102.33 (9.98)  | 82.12 (5.67)   | 90.93 (7.72)   | -9.35  | <b>0.001</b>         |
| Yes                                          | 210.12 (27.03) | 155.66 (18.88)  | 129.08 (14.41) | 151.95 (50.23) | 141.64 (33.50) | -14.33 | 0.26                 |

<sup>†</sup> Significance denotes association between per capita OOP expenditure and year effect by linear regression, significant p-values are bolded  
Abbreviations: MEPS, Medical Expenditure Panel Survey; GDP, Gross Domestic Product; SE, standard error; FPL, federal poverty line; OOP, out-of-pocket
